# Supplementary material for: The herpesviral antagonist m152 reveals differential activation of STING‐dependent IRF and NF‐κB signaling and STING's dual role during MCMV infection
Source: PubMed Central journal article supplement (PMC6396373; doi:10.15252/embj.2018100983), 2019-01-29

Source Data – Figure 3

Figure 3C

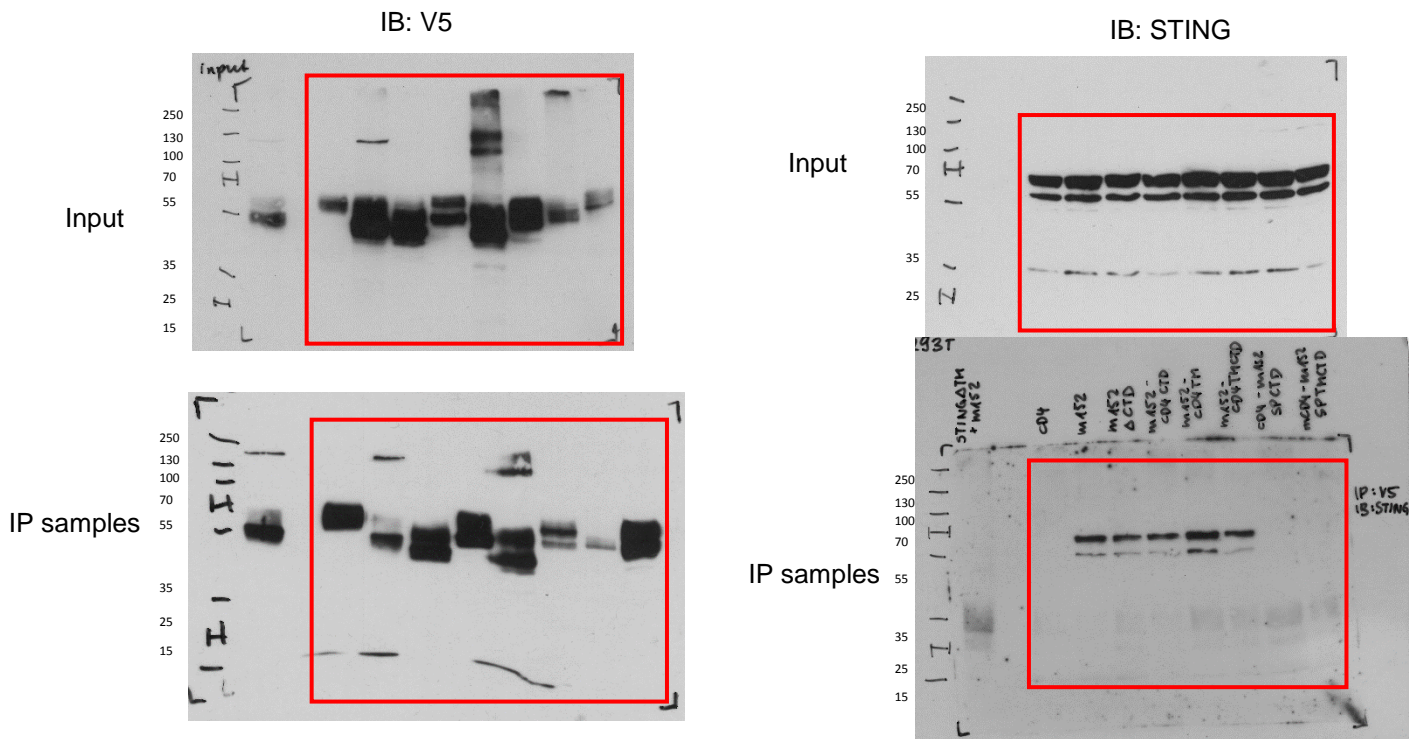

Figure 3D

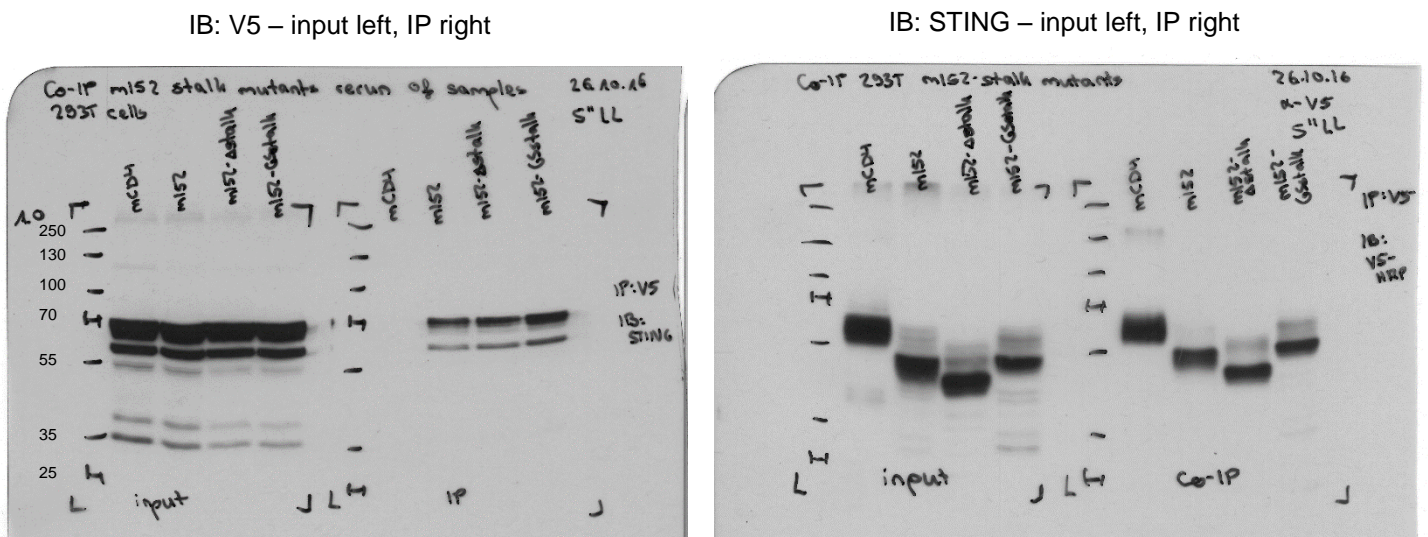

Supplement: EMBJ-38-e100983-s004.pdf [file EMBJ-38-e100983-s004.pdf]
